# Supplementary material
Source: Springer Nature journal article supplement (https://www.springermedizin.de/resource/supplementary/12937_2012_659_MOESM3_ESM.pdf/25653878)

**A**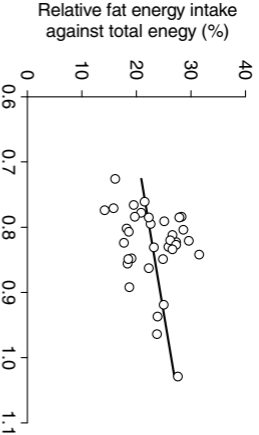**B**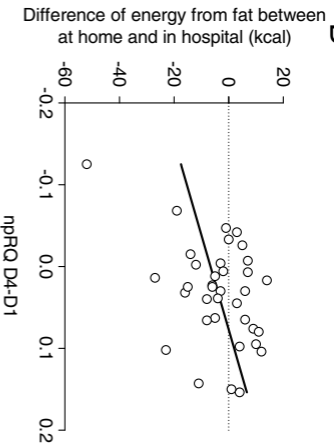**C**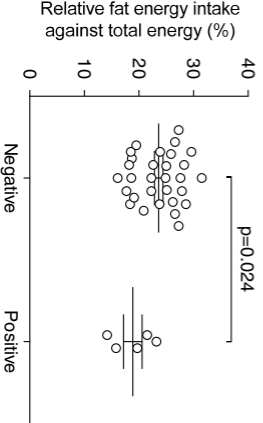**D**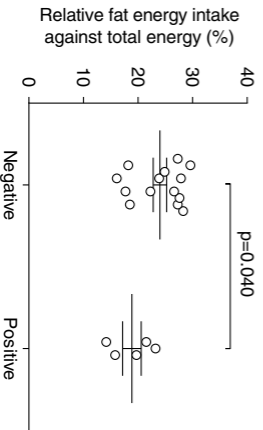

Supplement: MOESM3 [file 25653878]
